# Supplementary material
Source: Research Square preprint supplement (doi:10.21203/rs.3.rs-9260778/v1)

1. Essential oil source

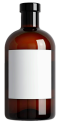

2. GC-MS analysis

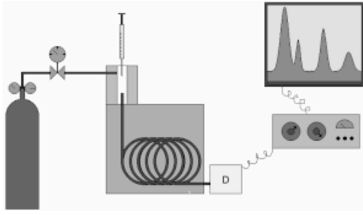

3. Nanoemulsion formulation

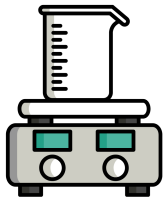

4. Physicochemical characterization

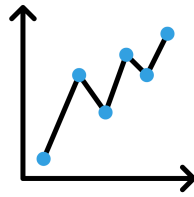

5. Mite rearing

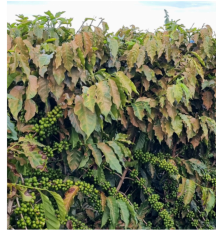

6. Bioassays

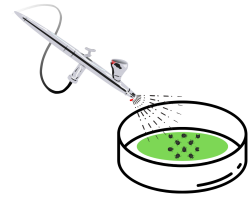

7. Mortality assessment

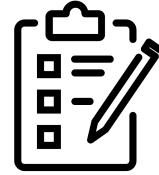

8. Statistical analysis

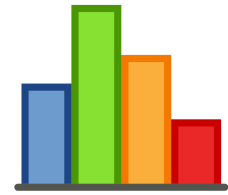

Supplement: Supplementary file 1 [file 265e875aad6d13ec5dd0d4d8.pdf]
