# Supplementary material
Source: Research Square preprint supplement (doi:10.21203/rs.3.rs-9260778/v1)
Supplement: Supplementary file 2 [file 7d58b3a9f3b1ff0461aef524.docx]

**Table 2**

Main compounds of *Mentha piperita* and their corresponding absorption bands

| **Compound** | **Structural formula** | | **Absorption peaks** | | --- |  |  | | --- | |
| --- | --- | --- | --- | --- |
| Menthol <iso-> | 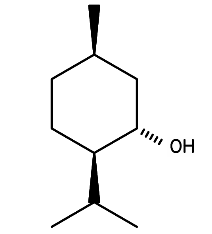 | 3600-3200 cm¹: O–H stretching vibration  3000-2820 cm¹: Alkyl (methylene and methyl) stretching vibrations  1470-1430 cm¹: Asymmetric bending vibrations of methylene and methyl groups  1370 cm¹: Symmetric bending vibration of methyl group  1050 cm¹: C–O stretching vibration |
| **Compound** | **Structural formula** | | **Absorption peaks** | | --- |  |  | | --- | |
| Menthone<iso-> | 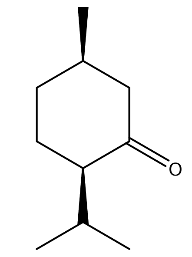 | 3000-2820 cm¹: Alkyl (methylene and methyl) stretching vibrations  1750-1700 cm¹: C=O stretching vibration  1470-1430 cm¹: Asymmetric bending vibrations of methylene and methyl groups  1370 cm¹: Symmetric bending vibration of methyl group |
| **Compound** | **Structural formula** | | **Absorption peaks** | | --- |  |  | | --- | |
| Cineole <1,8-> | 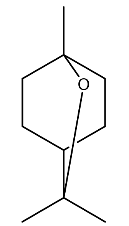 | 3000-2820 cm¹: Alkyl (methylene and methyl) stretching vibrations  1470-1430 cm¹: Asymmetric bending vibrations of methylene and methyl groups  1370 cm¹: Symmetric bending vibration of methyl group  1280-1230 cm¹: Asymmetric C–O–C stretching vibration |
